# Supplementary material
Source: publisher figshare collection journal article supplement (https://gsapubs.figshare.com/ndownloader/files/31535732)
Supplement: Supplementary file 1 [file 31535732]

## Sheet: Introduced raw and %
Table S1
Raw and relative pollen data of non-native plant species present in soil samples from the LCRF. Table represents only introduced species; the rest of the counted pollen was not identified specifically and was listed as “varia”. Overall, these pollen grains were represented primarily by species of Fabaceae, Cyperaceae, Rosaceae, Rhamnaceae, Poaceae families. Tree pollen included some spp. of Querc…
			SAMPLES	P10 A	P25 A	P30 A	P45 A	P60 A	P60 B	P80 A	P100 A	P130 A
			Absolute number, counts
	Plant Common name	Plant family	Genera and species								Pollen count is below statistical validity
1	Redscale	Amaranthaceae	Atriplex cf. rosea	2										Franssen et al., 2002
2	Pigweed amaranth	Amaranthaceae	Amaranthus cf. albus	3	12	1	51	12	16		1
3	Russian thistle	Amaranthaceae	Salsola cf. tragus	6		1							1890 (Hrusa & Gaskin, 2008)
4	Taraxacum	Asteraceae	Cnicus cf. benedictus				1			1				Zafar et al, 2009
5	Gazania	Asteraceae	Gazania cf. linearis	1						1
6	Pot marigold	Asteraceae	Calendula cf. officinalis		2			1		2	1
7	Italian thistle	Asteraceae	Carduus cf. pycnocephalus
8	Tocalote	Asteraceae	Centaurea cf. melitensis	15										Villodre & Garcia-Jacas, 2008
9	Bullthistle	Asteraceae	Cirsium vulgare	3		2			2				After 1824 (Mitich, 1998)
10	Gazania	Asteraceae	Gazania cf. linearis	1						1
11	Tumble mustard	Brassicaceae	Sisymbrium cf. altissimum	1	1
12	Rose clover	Fabaceae	Trifolium cf. hirtum	5									1940 (Jain&Martins, 1979; Molina-Freaner& Jain,1992)
13	Spanish broom	Fabaceae	Spartium cf. junceum					1					1848 (Nilsen, 2000)
14	Big heron bill	Geraniaceae	Erodium cf. botrys		1	1		2	1
15	Water speedwell	Plantaginaceae	Veronica cf. anagallis-aquatica	1	1	1		2		5
16	Corn	Poaceae	Zea mays		8	1			6				4,000 BP (da Fonseca, 2015)	Not growing now
17	Prostrate knotweed	Polygonaceae	Polygonum aviculare ssp. aviculare	1
18	Mahaleb cherry	Rosaceae	Prunus cf. mahaleb	3			2	1
19	Heartleaf willow	Salicaceae	Salix cf. cordata	1
20	Tree of heaven	Simaroubaceae	Ailanthus cf. altissima	3
21	Horse nettle	Solanaceae	Solanum cf. elaeagnifolium	1
22	Saltcedar, Tamarisk	Tamaricaceae	Tamarix cf. ramosissima		1	1	3	1					1839 (Robinson, 1965)	Di Tomaso,1998
23	Siberian elm	Ulmaceae	Ulmus cf. pumila	2	1		1						Unclear, but became widspread at~1900 (Zalapa et al, 2009)
			Total introduced	49	26	8	58	20	25	10	2
			Total native	376	1026	1706	2365	968	1441	915	28
			SUM total pollen	425	1052	1714	2423	988	1466	925	29
			Tracers Lycopodium	65	86	255	133	288	224	105	352
			Samples weight, g	10.3	11	10.1	10	10.5	10.6	10.5	10.4
			Lycopodium per 1 tab	18584	18584	18584	18584	18584	18584	18584	18584
			Number of tabs	2	2	2	2	2	2	2	2
			Pollen concentration grains/g	23594.3	41332.7	24735.4	67712.8	12143.5	22948.2	31184	294.436
			Relative number, %
			Atriplex cf. rosea	0.470588
			Amaranthus cf. albus	0.705882	1.14068	0.0583431	2.10483	1.21457	1.09141		3.57143
			Salsola cf. tragus	1.41176	0	0.0583431	0	0	0		0
			Cnicus cf. benedictus	0	0	0	0.0412712	0	0	0.108108	0
			Gazania cf. linearis	0.235294	0	0	0	0	0	0.108108	0
			Calendula cf. officinalis	0	0.190114	0	0	0.101215	0	0.216216	3.57143
			Carduus cf. pycnocephalus	0	0	0	0	0	0	0
			Centaurea cf. melitensis	3.52941	0	0	0	0	0	0
			Cirsium vulgare	0.705882	0	0.116686	0	0	0.136426	0
			Gazania linearis	0.235294	0	0	0	0	0	0.108108
			Sisymbrium altissimum	0.235294	0.095057	0	0	0	0	0
			Trifolium hirtum	1.17647	0	0	0	0	0	0
			Spartium junceum	0	0	0	0	0.101215	0	0
			Erodium botrys	0	0.095057	0.0583431	0	0.202429	0.0682128	0
			Veronica anagallis-aquatica	0.235294	0.095057	0.0583431	0	0.202429	0	0.540541
			Zea mays	0	0.760456	0.0583431	0	0	0.409277
			Polygonum aviculare ssp. aviculare	0.235294		0	0	0
			Prunus mahaleb	0.705882		0	0.0825423	0.101215
			Salix cordata	0.235294		0	0	0
			Ailanthus altissima	0.705882		0	0	0
			Solanum elaeagnifolium	0.235294		0	0	0
			Tamarix ramosissima	0	0.095057	0.0583431	0.123813	0.101215
			Ulmus pumila	0.470588	0.095057		0.0412712
			Total introduced, %	11.5294	2.47148	0.466744	2.39373	2.02429	1.70532	1.08108	7.14286
			Total native, %	88.4706	97.5285	99.5333	97.6063	97.9757	98.2947	98.9189	92.8571
				1	1	1	1	1	1	1	1

## Sheet: G49415
Rodriguez Padilla, A.M., et al., 2022, Joint earthquake ruptures of the San Andreas and San Jacinto faults, California, USA: Geology, https://doi.org/10.1130/G49415.1
